# Supplementary material for: Personalized Online Advertising Effectiveness: The Interplay of What, When, and Where
Source: Atypon-hosted journal article supplement (doi:10.1287/mksc.2015.0930), 2015-07-31
Supplement: mksc.2015.0930-sm-web_appendix.pdf [file mksc.2015.0930-sm-web_appendix.pdf]

**Robustness Checks for Field Experiment 1**

|                                        | Pooled Logit                |                             |                             | Probit                      |                             |                             | GEE                         |                             |                             |
|----------------------------------------|-----------------------------|-----------------------------|-----------------------------|-----------------------------|-----------------------------|-----------------------------|-----------------------------|-----------------------------|-----------------------------|
|                                        | Information                 | Consideration               | Post-Purchase               | Information                 | Consideration               | Post-Purchase               | Information                 | Consideration               | Post-Purchase               |
|                                        | Coefficient<br>(std. error) |
| <i>Constant</i>                        | -6.2637***<br>(0.0678)      | -6.6314***<br>(0.2009)      | -7.0389***<br>(0.2881)      | -3.1312***<br>(0.0295)      | -3.2077***<br>(0.1280)      | -3.2648***<br>(0.1728)      | -6.2548***<br>(0.0874)      | -6.6441***<br>(0.2030)      | -6.6441***<br>(0.2030)      |
| <i>HighDCP</i>                         | 1.3242***<br>(0.0807)       | 0.7926**<br>(0.2549)        | 0.6833*<br>(0.3560)         | 0.4846***<br>(0.0308)       | 0.2860**<br>(0.0904)        | 0.2042*<br>(0.1170)         | 1.3104***<br>(0.1023)       | 0.8086**<br>(0.2668)        | 0.8086*<br>(0.2668)         |
| <i>MedDCPcategory</i>                  | 0.9351***<br>(0.0847)       | 0.8915***<br>(0.2470)       | 0.5350<br>(0.3501)          | 0.3511***<br>(0.0318)       | 0.3072***<br>(0.0873)       | 0.1599<br>(0.1145)          | 0.9209***<br>(0.1064)       | 0.9036***<br>(0.2574)       | 0.9036<br>(0.2574)          |
| <i>MedDCPbrand</i>                     | 0.7959***<br>(0.0872)       | 0.7386**<br>(0.2618)        | 0.4766<br>(0.3625)          | 0.2870***<br>(0.0325)       | 0.2548**<br>(0.0914)        | 0.1296<br>(0.1175)          | 0.7814***<br>(0.1111)       | 0.7602**<br>(0.2728)        | 0.7602<br>(0.2728)          |
| <i>Time</i>                            | -0.0215**<br>(0.0071)       | 0.0022<br>(0.0175)          | -0.0203<br>(0.0266)         | -0.0068**<br>(0.0023)       | 0.0006<br>(0.0059)          | -0.0072<br>(0.0080)         | -0.0223**<br>(0.0080)       | 0.0030<br>(0.019)           | 0.0030<br>(0.0190)          |
| <i>HighDCP</i><br>× <i>Time</i>        | -0.0304**<br>(0.0093)       | -0.0171<br>(0.0251)         | -0.0004<br>(0.0362)         | -0.0112***<br>(0.0031)      | -0.0063<br>(0.0083)         | 0.0006<br>(0.0113)          | -0.0292**<br>(0.0104)       | -0.0181<br>(0.0277)         | -0.0181<br>(0.0277)         |
| <i>MedDCPcategory</i><br>× <i>Time</i> | -0.0151<br>(0.0095)         | -0.0253<br>(0.0247)         | 0.0161<br>(0.0346)          | -0.0070**<br>(0.0032)       | -0.0086<br>(0.0082)         | 0.0053<br>(0.0107)          | -0.0139<br>(0.0106)         | -0.0260<br>(0.0265)         | 0.0260<br>(0.0265)          |
| <i>MedDCPbrand</i><br>× <i>Time</i>    | -0.0060<br>(0.0095)         | -0.0309<br>(0.0272)         | 0.0061<br>(0.0370)          | -0.0024<br>(0.0032)         | -0.0105<br>(0.0089)         | 0.0031<br>(0.0114)          | -0.0048<br>(0.0109)         | -0.0324<br>(0.0287)         | -0.0324<br>(0.0287)         |
| <i>VisitsTotal</i>                     | 0.0586***<br>(0.0067)       | 0.1166***<br>(0.0254)       | 0.2378***<br>(0.0497)       | 0.0144***<br>(0.0041)       | 0.0467***<br>(0.0117)       | 0.0818***<br>(0.0196)       | 0.0589***<br>(0.0121)       | 0.1169***<br>(0.0229)       | 0.1169***<br>(0.0229)       |
| <i>BannerRepetitions</i>               | -0.0079***<br>(0.0011)      | -0.0097**<br>(0.0033)       | -0.0047<br>(0.0062)         | -0.0008**<br>(0.0004)       | -0.0020*<br>(0.0012)        | -0.0005<br>(0.0021)         | -0.0076***<br>(0.0013)      | -0.0096**<br>(0.0037)       | -0.0096<br>(0.0037)         |
| <i>BannersTotal</i>                    | -0.0031***<br>(0.0006)      | -0.0005<br>(0.0017)         | -0.0078*<br>(0.0045)        | -0.0015***<br>(0.0002)      | -0.0004<br>(0.0007)         | -0.0029*<br>(0.0016)        | -0.0033***<br>(0.0007)      | -0.0005<br>(0.0017)         | -0.0005**<br>(0.0017)       |
| <i>Random Intercept</i>                |                             |                             |                             | 0.1533***<br>(0.0126)       | 0.1233<br>(0.0776)          | 0.0898<br>(0.0977)          |                             |                             |                             |
| Observations                           | 1,027,753                   | 129,341                     | 107,791                     | 1,027,753                   | 129,341                     | 107,791                     | 1,027,753                   | 129,341                     | 107,791                     |
| -2 Log Likelihood                      | 34,960                      | 3,632                       | 1,958                       | 34,615                      | 3,628                       | 1,958                       | N/A                         | N/A                         | N/A                         |
| AIC                                    | 34,982                      | 3,654                       | 1,980                       | 34,639                      | 3,652                       | 1,982                       | N/A                         | N/A                         | N/A                         |
| BIC                                    | 35,112                      | 3,761                       | 2,085                       | 34,741                      | 3,733                       | 2,060                       | N/A                         | N/A                         | N/A                         |
| QIC                                    | N/A                         | N/A                         | N/A                         | N/A                         | N/A                         | N/A                         | 34,995                      | 3,657                       | 1,981                       |

Notes. DCP = Degree of content personalization. GEE = Generalized Estimating Equation. QIC = Quasi-likelihood under the independence model criterion. Time measured in days. \* $p < .1$ , \*\* $p < .05$ , \*\*\* $p < .001$ .

## Robustness Checks for Field Experiment 2

|                                     | Click-Through               |                             |                             | View-Through                |                             |                             |
|-------------------------------------|-----------------------------|-----------------------------|-----------------------------|-----------------------------|-----------------------------|-----------------------------|
|                                     | Pooled Logit                | Probit                      | GEE                         | Pooled Logit                | Probit                      | GEE                         |
|                                     | Coefficient<br>(std. error) |
| <i>Constant</i>                     | -6.3520***<br>(0.0737)      | -3.1602***<br>(0.0342)      | -6.3612***<br>(0.0799)      | -3.4952***<br>(0.0220)      | -2.0036***<br>(0.0114)      | -3.4952***<br>(0.0354)      |
| <i>Personalization</i>              | 1.0748***<br>(0.0723)       | 0.3621***<br>(0.0261)       | 1.0765***<br>(0.0779)       | -0.0693**<br>(0.0219)       | -0.0231**<br>(0.0106)       | -0.0693**<br>(0.0241)       |
| <i>Congruence</i>                   | -0.2432<br>(0.2970)         | -0.0675<br>(0.0979)         | -0.2364<br>(0.2961)         | 0.5457***<br>(0.0545)       | 0.2457***<br>(0.0267)       | 0.5457***<br>(0.0588)       |
| <i>Personalization × Congruence</i> | 0.0369<br>(0.3161)          | 0.0147<br>(0.1058)          | 0.0339<br>(0.3160)          | 0.2296***<br>(0.0634)       | 0.1173***<br>(0.0310)       | 0.2296***<br>(0.0682)       |
| <i>VisitsTotal</i>                  | 0.0730***<br>(0.0080)       | 0.0229***<br>-0.0046        | 0.0739***<br>(0.0128)       | 0.1209***<br>(0.0038)       | 0.0463***<br>(0.0027)       | 0.1209***<br>(0.0129)       |
| <i>BannerRepetitions</i>            | -0.0071***<br>(0.0014)      | -0.0008*<br>(0.0005)        | -0.0065**<br>(0.0021)       | -0.0166***<br>(0.0009)      | -0.0030***<br>(0.0003)      | -0.0166***<br>(0.0014)      |
| <i>BannersTotal</i>                 | -0.0021**<br>(0.0008)       | -0.0011**<br>(0.0003)       | -0.0024*<br>(0.0014)        | -0.00696***<br>(0.0005)     | -0.0030***<br>(0.0002)      | -0.007***<br>(0.0009)       |
| <i>Time</i>                         | -0.0394***<br>(0.0048)      | -0.0134***<br>(0.0016)      | -0.0389***<br>(0.0053)      | -0.0419***<br>(0.0021)      | -0.0177***<br>(0.0008)      | -0.0419***<br>(0.0023)      |
| <i>Random Intercept</i>             |                             | 0.1655***<br>(0.0166)       |                             |                             | 0.0827***<br>(0.0063)       |                             |
| Observations                        | 641,136                     | 641,136                     | 641,136                     | 641,136                     | 641,136                     | 641,136                     |
| -2 Log Likelihood                   | 23,884                      | 23,670                      | N/A                         | 107,815                     | 107,747                     | N/A                         |
| AIC                                 | 23,900                      | 23,688                      | N/A                         | 107,831                     | 107,765                     | N/A                         |
| BIC                                 | 23,991                      | 23,766                      | N/A                         | 107,922                     | 107,842                     | N/A                         |
| QIC                                 | N/A                         | N/A                         | 23,909                      | N/A                         | N/A                         | 107,863                     |

Notes. GEE = Generalized Estimating Equation. QIC = Quasi-likelihood under the independence model criterion. Time measured in days.

\* $p < .1$ . \*\* $p < .05$ . \*\*\* $p < .001$ .

## Marginal Effects Analysis for Interaction Terms in Field Experiments 1 and 2

*Field Experiment 1.* The interpretation of interaction terms in nonlinear probability models is not as straightforward as in linear models and the sign of a marginal effect is not necessarily the same as that of a coefficient of the corresponding interaction term (Ai and Norton 2003; Goldfarb and Tucker 2011). For the estimates of our initial model (see Table 2), we therefore calculated the marginal effects of the interactions between the investigated DCPs and *Time* to verify our findings. The marginal effects in the information state were  $-.0000978$  ( $p < .001$ ) for *HighDCP*  $\times$  *Time*;  $-.0000502$  ( $p < .001$ ) for *MedDCPcategory*  $\times$  *Time*; and  $-.0000258$  ( $p < .05$ ) for *MedDCPbrand*  $\times$  *Time*. In line with the estimated coefficients, they were all negative and the *HighDCP*  $\times$  *Time* interaction had the largest effect. In the consideration and post-purchase states, the respective marginal effects were not significant, also in accordance with our findings.

*Field Experiment 2.* Regarding click-through, the marginal effect of the *Personalization*  $\times$  *Congruence* interaction (see Table 4) is not significant, whereas it is positive and significant for view-through ( $.0060735$ ,  $p < .001$ ), in line with the estimated coefficients for the corresponding interaction terms.

## Parameter Estimates for Field Experiment 2 with Varying View-through Windows

|                                            | 30 Days                     |                 | 7 Days                      |                 | 1 Day                       |                 |
|--------------------------------------------|-----------------------------|-----------------|-----------------------------|-----------------|-----------------------------|-----------------|
|                                            | Coefficient<br>(std. error) | <i>p</i> -Value | Coefficient<br>(std. error) | <i>p</i> -Value | Coefficient<br>(std. error) | <i>p</i> -Value |
| <i>Constant</i>                            | -3.6544***<br>(0.0270)      | <0.0001         | -3.6953***<br>(0.0275)      | <0.0001         | -3.9933***<br>(0.0313)      | <0.0001         |
| <i>Personalization</i>                     | -0.0521**<br>(0.0246)       | 0.0338          | -0.0511**<br>(0.0251)       | 0.0415          | -0.0480*<br>(0.0284)        | 0.0909          |
| <i>Congruence</i>                          | 0.5802***<br>(0.0574)       | <0.0001         | 0.5627***<br>(0.0589)       | <0.0001         | 0.4659***<br>(0.0699)       | <0.0001         |
| <i>Personalization</i> × <i>Congruence</i> | 0.2419***<br>(0.0665)       | 0.0003          | 0.2384***<br>(0.0682)       | 0.0005          | 0.2284**<br>(0.0810)        | 0.0048          |
| <i>VisitsTotal</i>                         | 0.1016***<br>(0.0058)       | <0.0001         | 0.1032***<br>(0.0058)       | <0.0001         | 0.1032***<br>(0.0059)       | <0.0001         |
| <i>BannerRepetitions</i>                   | -0.0136***<br>(0.0009)      | <0.0001         | -0.0126***<br>(0.0009)      | <0.0001         | -0.0090***<br>(0.0010)      | <0.0001         |
| <i>BannersTotal</i>                        | -0.0077***<br>(0.0005)      | <0.0001         | -0.0073***<br>(0.0005)      | <0.0001         | -0.0058***<br>(0.0005)      | <0.0001         |
| <i>Time</i>                                | -0.0342***<br>(0.002)       | <0.0001         | -0.0421***<br>(0.0021)      | <0.0001         | -0.0675***<br>(0.0027)      | <0.0001         |
| <i>Random Intercept</i>                    | 0.4055***<br>(0.0319)       | <0.0001         | 0.3967***<br>(0.0314)       | <0.0001         | 0.3336***<br>(0.0311)       | <0.0001         |
| Observations                               | 641,136                     |                 | 641,136                     |                 | 641,136                     |                 |
| -2 Log Likelihood                          | 111,897                     |                 | 107,481                     |                 | 82,327                      |                 |
| AIC                                        | 111,915                     |                 | 107,499                     |                 | 82,345                      |                 |
| BIC                                        | 111,992                     |                 | 107,576                     |                 | 82,422                      |                 |

Notes. Time measured in days.

\**p* < .1. \*\**p* < .05. \*\*\**p* < .001.

## References

Ai C, Norton EC (2003) Interaction terms in logit and probit models. *Econom. Lett.* 80(1):123–129.

Goldfarb A, Tucker CE (2011) Online display advertising: Targeting and obtrusiveness. *Marketing Sci.* 30(3):389–404.
